# Supplementary material for: Plasma Sphingomyelin Disturbances: Unveiling Its Dual Role as a Crucial Imunopathological Factor and a Severity Prognostic Biomarker in COVID-19
Source: Preprints.org preprint supplement (doi:10.20944/preprints202306.0752.v1), 2023-06-12
Supplement: Supplementary file 1 [file supplementary]

## *Supplementary Material*

### **Plasma sphingomyelin disturbances: unveiling its dual role as a crucial imunopathological factor and a severity prognostic biomarker in COVID-19**

**Diana M. Toro<sup>1,2,†</sup>, Pedro V. da Silva-Neto<sup>1,2,†</sup>, Jonatan C. S. de Carvalho<sup>1,3,†</sup>, Carlos A. Fuzo<sup>1,†</sup>, Malena M. Pérez<sup>1</sup>, Vinícius E. Pimentel<sup>1,4</sup>, Thais F. C. Fraga-Silva<sup>4</sup>, Camilla N. S. Oliveira<sup>1,4</sup>, Glaucia R. Caruso<sup>1</sup>, Adriana F. L. Vilela<sup>3</sup>, Pedro N. Azevedo<sup>3,4</sup>, Thiago V. D. Felipe<sup>3</sup>, Jamille G. M. Argolo<sup>5</sup>, Augusto M. Degiovani<sup>6</sup>, Fátima M. Ostini<sup>6</sup>, Marley R. Feitosa<sup>7,11</sup>, Rogerio S. Parra<sup>7,11</sup>, Fernando C. Vilar<sup>8,11</sup>, Gilberto G. Gaspar<sup>8</sup>, José J. R. da Rocha<sup>7</sup>, Omar Feres<sup>7,11</sup>, Gabriel Peinado Costa<sup>10</sup>, Sandra R. C. Maruyama<sup>9</sup>, Elisa M. S. Russo<sup>1</sup>, Ana P. M. Fernandes<sup>5</sup>, Isabel K. F. M. Santos<sup>4</sup>, Adriana Malheiro<sup>2</sup>, Ruxana T. Sadikot<sup>12</sup>, Vânia L. D. Bonato<sup>4</sup>, Cristina R. B. Cardoso<sup>1</sup>, Marcelo Dias-Baruffi<sup>1</sup>, Átila A. Trapé<sup>10,‡</sup>, Lúcia H. Faccioli<sup>1,‡</sup> and Carlos A. Sorgi<sup>2,3,4,‡\*</sup> and ImmunoCovid Consortium Group.**

**\* Correspondence:** Carlos A. Sorgi - [carlos.sorgi@usp.br](mailto:carlos.sorgi@usp.br) +55 16 3315-9176

**†** These authors contributed equally to this work and share first authorship

**#** These authors contributed equally to this work and share senior authorship

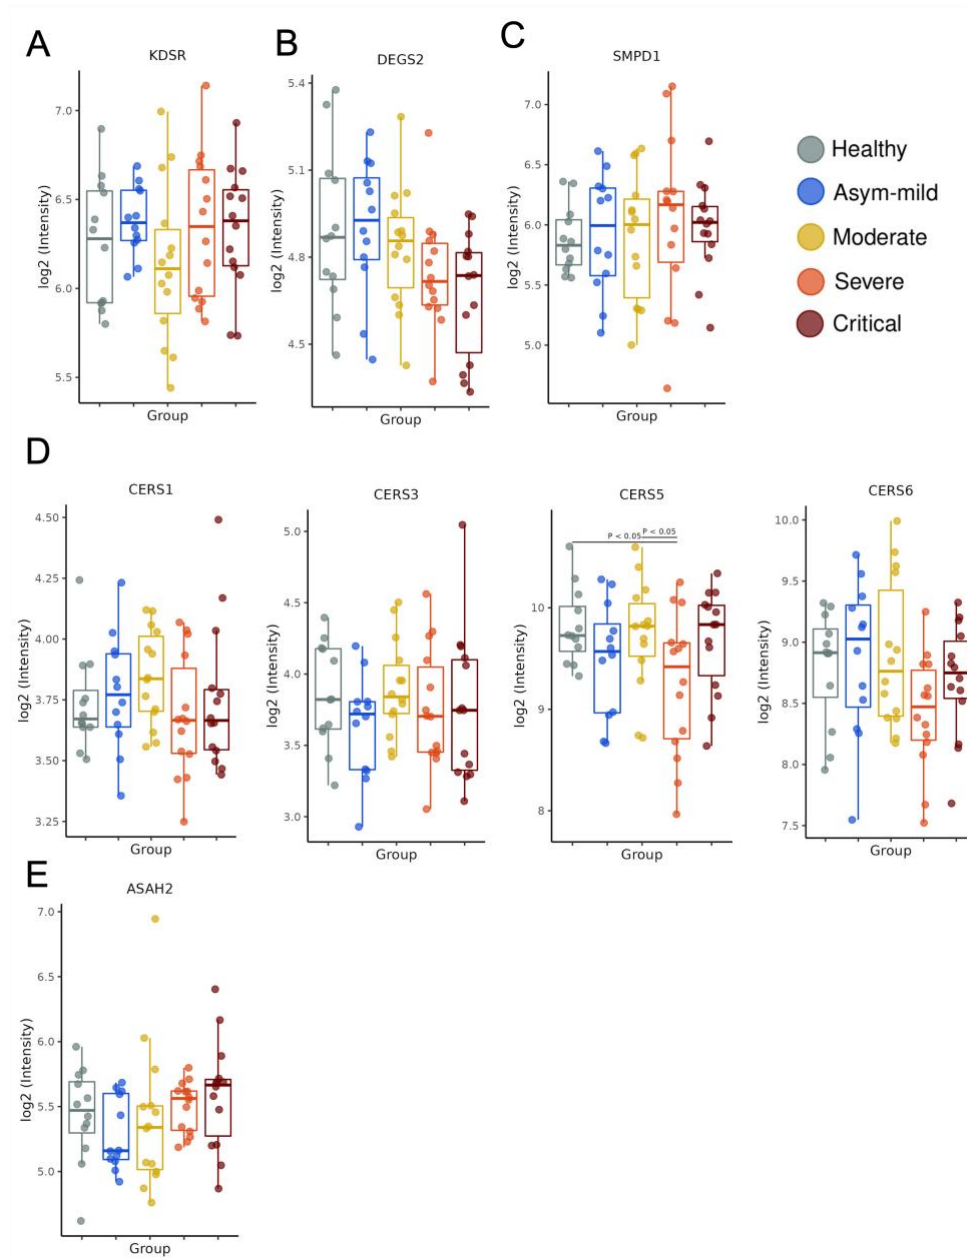

**Supplementary Figure 1. Expression of sphingolipid metabolic enzymes in patients with COVID-19 according to severity.** (A) 3-ketodihydrosphingosine reductase (*KDSR*), (B) Sphingolipid delta (4)-desaturase DES2 (*DEGS2*), (C) Sphingomyelin phosphodiesterase (*SMPD 1*), (D) Ceramide synthase 1, 3, 4, 5 (*CERS1/3/5/6*), (E) N-acylsphingosine amidohydrolase 2 (*ASAH2*), in: Control (n=12), mild (n=12), moderate (n=14), severe (n=14) and critical (n=14). The log<sub>2</sub> of normalized gene expression profiles for analyzed groups are shown as boxplots. Significant differences in transcript expression correspond to Benjamini and Hockberg adjusted p-values obtained from whole transcriptome differential expression analysis considering a threshold of < 0.05 in at least one pair of clinical groups. Details of enzyme nomenclatures Supplementary Table 4.

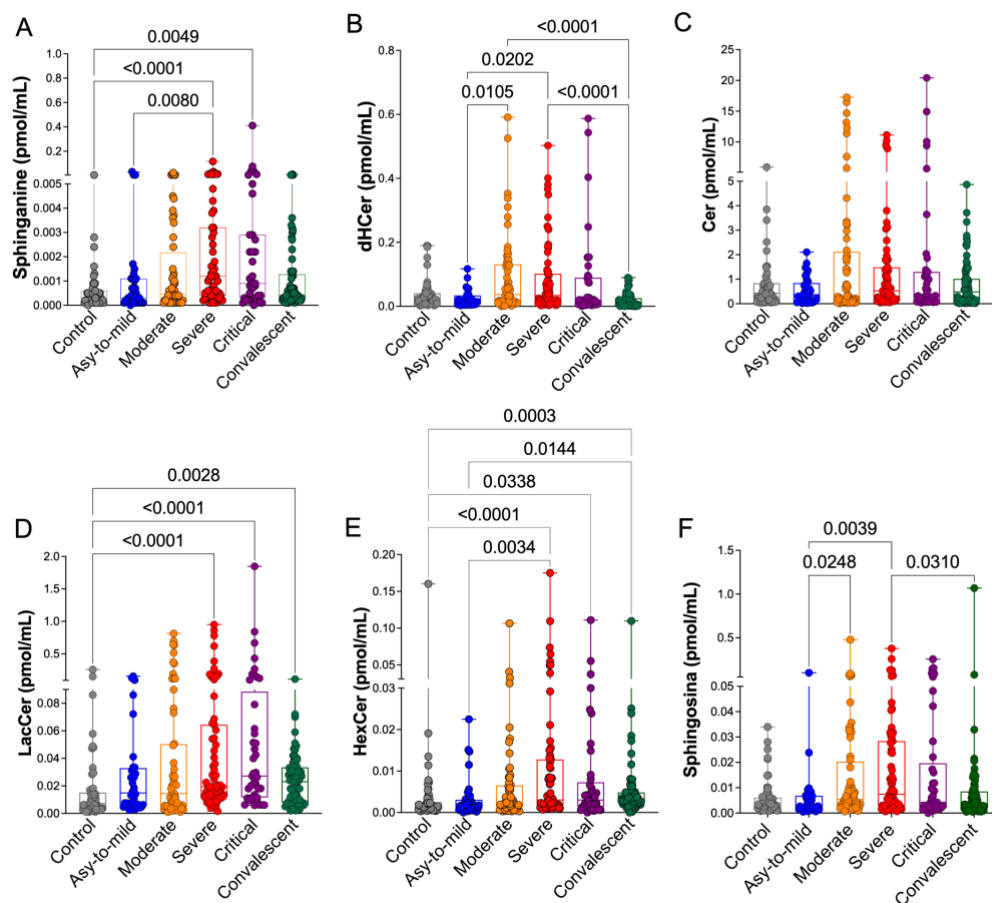

**Supplementary Figure 2. Sphingolipids abundance profile in patients with COVID-19.** LC-MS/MS measurements for (A) Sphinganine (18:0), (B) dihydroceramide (dHCer), (C) Ceramide (Cer), (D) Lactosylceramide 16:0 (LacCer), (E) Hexaglycosylceramide (HexCer) and (F) Sphingosine. Statistical analyzes were performed using the Kruskal-Wallis multiple comparison test (non-parametric), followed by the Dunn post-test for pairwise comparison. Data are expressed as median in boxplot graphics. Significance levels shown are based on statistically significant p-values between groups with p-value < 0.05.

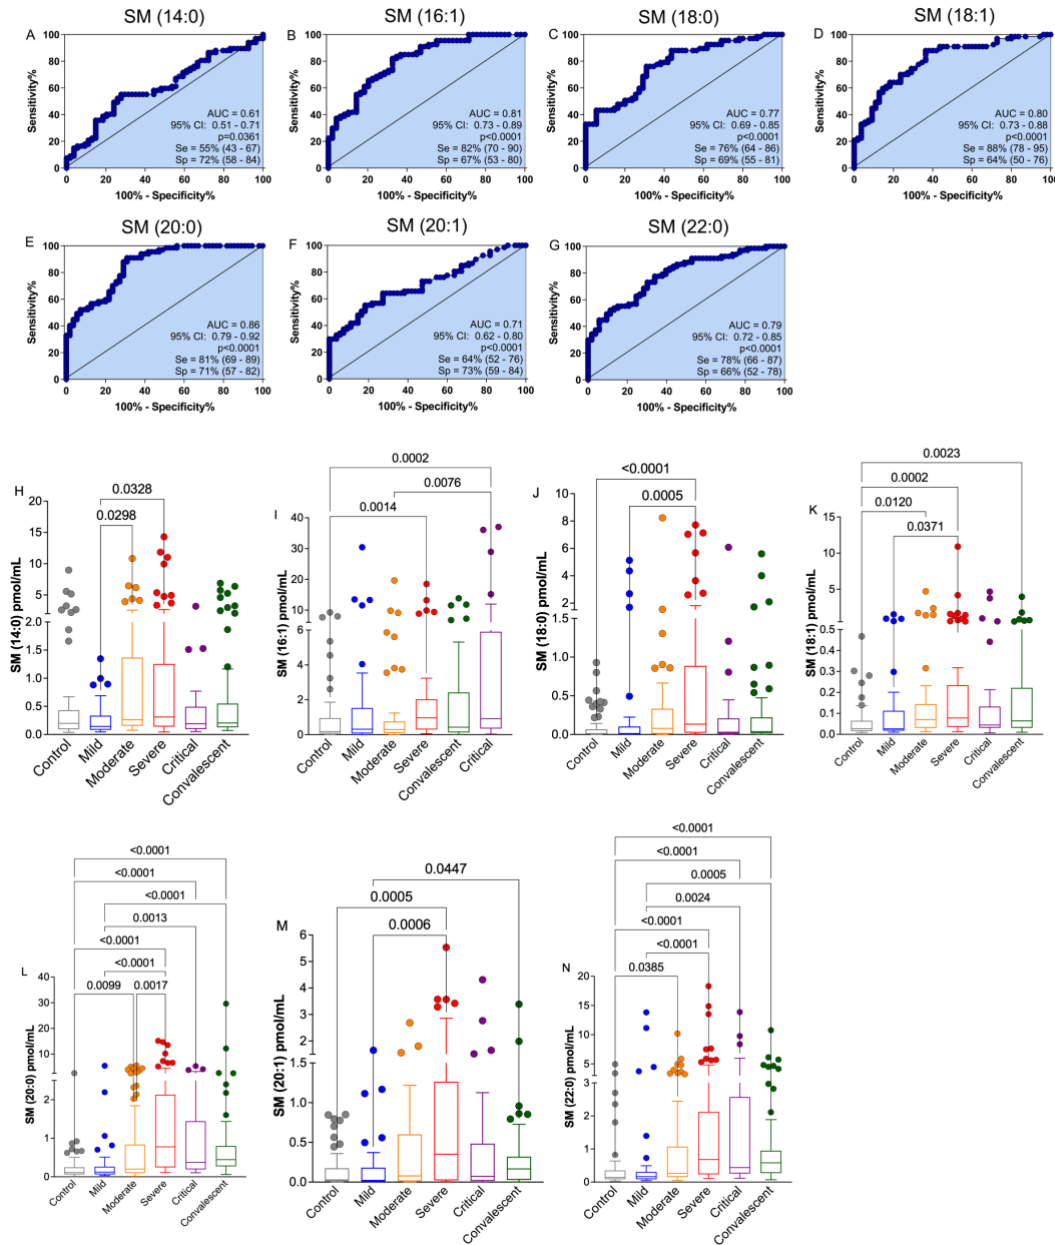

**Supplementary Figure 3. ROC curves and Analysis of serum abundance sphingomyelin (SM) species (14:0), (16:1), (18:0), (18:1), (20:0), (20:1) and (22:0) in COVID-19.** (A-G) ROC curves for sphingomyelin species (SM) in patients with severe forms of Covid-19. The curves compare the Severe patients groups (n= 67) with the control (n=55). AUC: area under the curve; Se: sensitivity; Sp: specificity; CI: 95% confidence interval. (H-N) sphingomyelin class profile in control subjects compared to patients with COVID-19 and convalescents in: mild (n=36), moderate (n=60), severe (n=67), critical (n=41) and Convalescent individuals (n=77). Statistical analyzes were performed using the Kruskal-Wallis multiple comparison test (non-parametric), followed by the Dunn post-test for pairwise comparison. Data are expressed as median in boxplot graphics with minimum and maximum values. Significance levels shown are based on statistically significant p-values between groups with p-value < 0.05.

$$(I) AUC_{n(k)total} = AUC_{n(k)} (1 + 0.0109n + \frac{0.0109^2 n(n-1)}{2})$$

$$(II) C_{lipid} = \frac{AUC_{lipid}}{AUC_{IS}} * C_{IS}$$

**Supplementary Figure 4. Lipid quantification using internal standard and monoisotopic correction. (I)** Monoisotopic correction (1):  $AUC_{n(k)total}$  = corrected analyte area under the curve,  $AUC_{n(k)}$  = quantified analyte monoisotopic mass area under the curve,  $n$  = number of C atoms,  $k$  = number of double bonds, **(II)** Lipid quantification based on the internal standard (1):  $C_{lipid}$  = analyte concentration (pmol/mL),  $AUC_{lipid}$  = monoisotopically corrected analyte area under the curve by Equation I ( $AUC_{n(k)total}$ ),  $AUC_{IS}$  = area under the curve of internal standard corresponding to the analyte family,  $C_{IS}$  = internal standard concentration according to the Certificate of Analysis (Lot Number: LM6004-LM40-112A, Avanti Polar Lipids).

**Supplementary Table 1: Sphingolipid subclasses and species detected in our cohort.**

| Subclasses                    | Number of species | Species Description                                                                                                                                                                        |
|-------------------------------|-------------------|--------------------------------------------------------------------------------------------------------------------------------------------------------------------------------------------|
| Ceramide                      | 9                 | Cer (16:0), Cer (18:0), Cer (18:1), Cer (20:0), Cer (22:0), Cer (23:0), Cer (24:0), Cer (24:1), Cer (25:0)                                                                                 |
| Sphingosine                   | 2                 | Sphingosine (14:0), Sphingosine (18:0)                                                                                                                                                     |
| Sphinganine                   | 1                 | Sphinganine (18:0)                                                                                                                                                                         |
| Sphingomyelin (SM)            | 17                | SM (14:0), SM (16:0), SM (16:1), SM (18:0), SM (18:1), SM (20:0), SM (20:1), SM (22:0), SM (22:1), SM (23:0), SM (23:1), SM (24:0), SM (24:1), SM (25:0), SM (25:1), SM (26:0), SM (26:1). |
| Hexaglycosylceramide (HexCer) | 2                 | HexCer (16:0), HexCer (24:0)                                                                                                                                                               |
| Lactosylceramide (LacCer)     | 2                 | LacCer (16:0), LacCer(d18:1/14:0)                                                                                                                                                          |
| Dihydroceramide (dHCer)       | 5                 | dHCer(d18:0/16:0), dHCer(d18:0/18:0), dHCer(d18:0/24:0), dHCer(d20:0/16:0), dHCer(d20:0/22:0)                                                                                              |
| Total                         | 38                |                                                                                                                                                                                            |

**Supplementary Table 2. Target high-resolution mass spectrometry parameters for SL species.**

| Experiment | Precursor ion (m/z) | Analyte               | Internal Standard  | Fragment ion (m/z) |
|------------|---------------------|-----------------------|--------------------|--------------------|
| 1          | 100-2000            | TOF-MS (untargeted)   | -                  | -                  |
| 2          | 552,5               | Ceramide (d18:1/17:0) | IS                 | 534.5237-534.5297  |
| 3          | 647,5               | SM (d18:1/12:0)       | IS Mix II (Avanti) | 184.0703-184.0753  |
| 4          | 286,2               | Sphingosine C17:0     | IS Mix II (Avanti) | 268.2623-268.2663  |

|    |        |                       |                              |                      |
|----|--------|-----------------------|------------------------------|----------------------|
| 5  | 288,2  | Sphinganine C17:0     | <i>IS Mix II (Avanti)</i>    | 270.2750-270.2810    |
| 6  | 368,2  | Sphinganine-1-P C17:0 | <i>IS Mix II (Avanti)</i>    | 270.2750-270.2830    |
| 7  | 482,4  | Ceramide (d18:1/12:0) | <i>IS Mix II (Avanti)</i>    | 264.2653-264.2703    |
| 8  | 644,5  | GlcCer (d18:1/12:0)   | <i>IS Mix II (Avanti)</i>    | 264.2652-264.26702   |
| 9  | 806,5  | LacCer (d18:1/12:0)   | <i>IS Mix II (Avanti)</i>    | 264.2652-264.26702   |
| 10 | 538,5  | Ceramide (d18:1/16:0) | <i>Ceramide (d18:1/12:0)</i> | 264.2652 - 264.26710 |
| 11 | 566,5  | Ceramide (d18:1/18:0) | <i>Ceramide (d18:1/12:0)</i> | 264.2652 - 264.26704 |
| 12 | 648,6  | Ceramide (d18:1/24:1) | <i>Ceramide (d18:1/12:0)</i> | 264.2652 - 264.26802 |
| 13 | 650,6  | Ceramide (d18:1/24:0) | <i>Ceramide (d18:1/12:0)</i> | 264.2652 - 264.26702 |
| 14 | 664,4  | Ceramide (d18:1/25:0) | <i>Ceramide (d18:1/12:0)</i> | 264.2652 - 264.26702 |
| 15 | 700,5  | GlcCer (d18:1/16:0)   | <i>GlcCer (d18:1/12:0)</i>   | 264.2652 - 264.26702 |
| 16 | 728,6  | GlcCer (d18:1/18:0)   | <i>GlcCer (d18:1/12:0)</i>   | 264.2652 - 264.26702 |
| 17 | 810,6  | GlcCer (d18:1/24:1)   | <i>GlcCer (d18:1/12:0)</i>   | 264.2652 - 264.26702 |
| 18 | 731,6  | SM (d18:1/18:0)       | <i>SM (d18:1/12:0)</i>       | 184.0703 - 184.0753  |
| 19 | 815,7  | SM (d18:1/24:0)       | <i>SM (d18:1/12:0)</i>       | 184.0703 - 184.0753  |
| 20 | 862,6  | LacCer (d18:1/16:0)   | <i>LacCer (d18:1/12:0)</i>   | 264.2652 - 264.26702 |
| 21 | 974,7  | LacCer (d18:1/24:0)   | <i>LacCer (d18:1/12:0)</i>   | 264.2652 - 264.26702 |
| 22 | 300,3  | Sphingosine C18:0     | <i>Sphingosine C17:0</i>     | 282.2480 - 282.2530  |
| 23 | 272,2  | Sphingosine C16:0     | <i>Sphingosine C17:0</i>     | 254.2164 - 254.2214  |
| 24 | 244,2  | Sphingosine C14:0     | <i>Sphingosine C17:0</i>     | 226.1765 - 226.1815  |
| 25 | 302,2  | Sphinganine C18:0     | <i>Sphinganine C17:0</i>     | 284.2912 - 284.2952  |
| 26 | 274,2  | Sphinganine C16:0     | <i>Sphinganine C17:0</i>     | 256.2612 - 256.2652  |
| 27 | 382,2  | Sphinganine-1-P C18:0 | <i>Sphinganine-1-P C17:0</i> | 364.2120 - 364.2160  |
| 28 | 354,2  | Sphinganine-1-P C16:0 | <i>Sphinganine-1-P C17:0</i> | 336.2298 - 336.2338  |
| 29 | 356,35 | Sphingosine C22:1     | <i>Sphingosine C17:0</i>     | 338.3500 - 338.3540  |
| 30 | 328,3  | Sphingosine C20:1     | <i>Sphingosine C17:0</i>     | 310.3000 - 310.3040  |
| 31 | 330,3  | Sphinganine C20:0     | <i>Sphinganine C17:0</i>     | 214.3000 - 214.3040  |
| 32 | 410,3  | Sphinganine-1-P C20:0 | <i>Sphinganine C17:0</i>     | 392.3000 - 392.3040  |
| 33 | 464,4  | Ceramide (d18:1/18:1) | <i>Ceramide (d18:1/12:0)</i> | 264.2694 - 264.2714  |
| 34 | 594,6  | Ceramide (d18:1/20:0) | <i>Ceramide (d18:1/12:0)</i> | 264.2671 - 264.2701  |
| 35 | 622,7  | Ceramide (d18:1/22:0) | <i>Ceramide (d18:1/12:0)</i> | 264.2671 - 264.2701  |
| 36 | 634,7  | Ceramide (d18:1/23:1) | <i>Ceramide (d18:1/12:0)</i> | 264.2671 - 264.2701  |
| 37 | 636,7  | Ceramide (d18:1/23:0) | <i>Ceramide (d18:1/12:0)</i> | 264.2671 - 264.2701  |
| 38 | 662,8  | Ceramide (d18:1/25:1) | <i>Ceramide (d18:1/12:0)</i> | 264.2671 - 264.2701  |
| 39 | 676,8  | Ceramide (d18:1/26:1) | <i>Ceramide (d18:1/12:0)</i> | 264.2671 - 264.2701  |
| 40 | 678,8  | Ceramide (d18:1/26:0) | <i>Ceramide (d18:1/12:0)</i> | 264.2671 - 264.2701  |

|    |         |                        |                            |                      |
|----|---------|------------------------|----------------------------|----------------------|
| 41 | 675,5   | SM (d18:1/14:0)        | <i>SM (d18:1/12:0)</i>     | 183.9758 - 184.0758  |
| 42 | 701,6   | SM (d18:1/16:0)        | <i>SM (d18:1/12:0)</i>     | 183.9758 - 184.0758  |
| 43 | 703,57  | SM (d18:1/16:0)        | <i>SM (d18:1/12:0)</i>     | 183.9758 - 184.0758  |
| 44 | 729,6   | SM (d18:1/18:1)        | <i>SM (d18:1/12:0)</i>     | 183.9758 - 184.0758  |
| 45 | 757,6   | SM (d18:1/20:1)        | <i>SM (d18:1/12:0)</i>     | 183.9758 - 184.0758  |
| 46 | 759,6   | SM (d18:1/20:0)        | <i>SM (d18:1/12:0)</i>     | 183.9758 - 184.0758  |
| 47 | 785,591 | SM (d18:1/22:1)        | <i>SM (d18:1/12:0)</i>     | 183.9758 - 184.0758  |
| 48 | 787,6   | SM (d18:1/22:0)        | <i>SM (d18:1/12:0)</i>     | 183.9758 - 184.0758  |
| 49 | 799,6   | SM (d18:1/23:1)        | <i>SM (d18:1/12:0)</i>     | 183.9758 - 184.0758  |
| 50 | 801,6   | SM (d18:1/23:0)        | <i>SM (d18:1/12:0)</i>     | 183.9758 - 184.0758  |
| 51 | 813,7   | SM (d18:1/24:1)        | <i>SM (d18:1/12:0)</i>     | 183.9758 - 184.0758  |
| 52 | 827,7   | SM (d18:1/25:1)        | <i>SM (d18:1/12:0)</i>     | 183.9758 - 184.0758  |
| 53 | 829,7   | SM (d18:1/25:0)        | <i>SM (d18:1/12:0)</i>     | 183.9758 - 184.0758  |
| 54 | 841,7   | SM (d18:1/26:1)        | <i>SM (d18:1/12:0)</i>     | 183.9758 - 184.0758  |
| 55 | 843,7   | SM (d18:1/26:0)        | <i>SM (d18:1/12:0)</i>     | 183.9758 - 184.0758  |
| 56 | 726,58  | HexCer (d18:1/18:1)    | <i>GlcCer (d18:1/12:0)</i> | 264.2652 - 264.26702 |
| 57 | 754,7   | HexCer (d18:1/20:1)    | <i>GlcCer (d18:1/12:0)</i> | 264.2652 - 264.26703 |
| 58 | 756,7   | HexCer (d18:1/20:0)    | <i>GlcCer (d18:1/12:0)</i> | 264.2652 - 264.26704 |
| 59 | 782,7   | HexCer (d18:1/22:1)    | <i>GlcCer (d18:1/12:0)</i> | 264.2652 - 264.26705 |
| 60 | 784,66  | HexCer (d18:1/22:0)    | <i>GlcCer (d18:1/12:0)</i> | 264.2652 - 264.26706 |
| 61 | 796,7   | HexCer (d18:1/23:1)    | <i>GlcCer (d18:1/12:0)</i> | 264.2652 - 264.26707 |
| 62 | 798,7   | HexCer (d18:1/23:0)    | <i>GlcCer (d18:1/12:0)</i> | 264.2652 - 264.26708 |
| 63 | 808,6   | HexCer (d18:1/24:2)    | <i>GlcCer (d18:1/12:0)</i> | 264.2652 - 264.26709 |
| 64 | 812,7   | HexCer (d18:1/24:0)    | <i>GlcCer (d18:1/12:0)</i> | 264.2652 - 264.26710 |
| 65 | 824,6   | HexCer (d18:1/25:1)    | <i>GlcCer (d18:1/12:0)</i> | 264.2652 - 264.26711 |
| 66 | 826,8   | HexCer (d18:1/25:0)    | <i>GlcCer (d18:1/12:0)</i> | 264.2652 - 264.26712 |
| 67 | 836,6   | HexCer (d18:1/26:2)    | <i>GlcCer (d18:1/12:0)</i> | 264.2652 - 264.26713 |
| 68 | 838,8   | HexCer (d18:1/26:1)    | <i>GlcCer (d18:1/12:0)</i> | 264.2652 - 264.26714 |
| 69 | 840,8   | HexCer (d18:1/26:0)    | <i>GlcCer (d18:1/12:0)</i> | 264.2652 - 264.26715 |
| 70 | 716,7   | HexCer OH (d18:1/16:0) | <i>GlcCer (d18:1/12:0)</i> | 264.2652 - 264.26716 |
| 71 | 744,7   | HexCer OH (d18:1/18:0) | <i>GlcCer (d18:1/12:0)</i> | 264.2652 - 264.26717 |
| 72 | 772,7   | HexCer OH (d18:1/20:0) | <i>GlcCer (d18:1/12:0)</i> | 264.2652 - 264.26718 |
| 73 | 798,7   | HexCer OH (d18:1/22:1) | <i>GlcCer (d18:1/12:0)</i> | 264.2652 - 264.26719 |
| 74 | 800,7   | HexCer OH (d18:1/22:0) | <i>GlcCer (d18:1/12:0)</i> | 264.2652 - 264.26720 |
| 75 | 812,7   | HexCer OH (d18:1/23:1) | <i>GlcCer (d18:1/12:0)</i> | 264.2652 - 264.26721 |
| 76 | 814,7   | HexCer OH (d18:1/23:0) | <i>GlcCer (d18:1/12:0)</i> | 264.2652 - 264.26722 |
| 77 | 826,8   | HexCer OH (d18:1/24:1) | <i>GlcCer (d18:1/12:0)</i> | 264.2652 - 264.26723 |

|     |           |                          |                              |                      |
|-----|-----------|--------------------------|------------------------------|----------------------|
| 78  | 828,8     | HexCer OH (d18:1/24:0)   | <i>GlcCer (d18:1/12:0)</i>   | 264.2652 - 264.26724 |
| 79  | 840,8     | HexCer OH (d18:1/25:1)   | <i>GlcCer (d18:1/12:0)</i>   | 264.2652 - 264.26725 |
| 80  | 842,8     | HexCer OH (d18:1/25:0)   | <i>GlcCer (d18:1/12:0)</i>   | 264.2652 - 264.26726 |
| 81  | 854,8     | HexCer OH (d18:1/26:1)   | <i>GlcCer (d18:1/12:0)</i>   | 264.2652 - 264.26727 |
| 82  | 856,8     | HexCer OH (d18:1/26:0)   | <i>GlcCer (d18:1/12:0)</i>   | 264.2652 - 264.26728 |
| 83  | 974,7502  | LacCer (d18:0/24:1)      | <i>LacCer (d18:1/12:0)</i>   | 264.2687 - 264.2727  |
| 84  | 972,7346  | LacCer (d18:1/24:1(15Z)) | <i>LacCer (d18:1/12:0)</i>   | 264.2687 - 264.2728  |
| 85  | 1002,7815 | LacCer (d18:0/26:1)      | <i>LacCer (d18:1/12:0)</i>   | 264.2687 - 264.2729  |
| 86  | 1000,7659 | LacCer (d18:1/26:1(17Z)) | <i>LacCer (d18:1/12:0)</i>   | 264.2687 - 264.2730  |
| 87  | 886,6407  | LacCer (d18:1/18:1(9Z))  | <i>LacCer (d18:1/12:0)</i>   | 264.2687 - 264.2731  |
| 88  | 889,6563  | LacCer (d18:0/18:1)      | <i>LacCer (d18:1/12:0)</i>   | 264.2687 - 264.2732  |
| 89  | 948,7346  | LacCer (d18:0/22:0)      | <i>LacCer (d18:1/12:0)</i>   | 264.2687 - 264.2733  |
| 90  | 946,7189  | LacCer (d18:1/22:0)      | <i>LacCer (d18:1/12:0)</i>   | 264.2687 - 264.2734  |
| 91  | 920,7033  | LacCer (d18:0/20:0)      | <i>LacCer (d18:1/12:0)</i>   | 264.2687 - 264.2735  |
| 92  | 918,6876  | LacCer (d18:1/20:0)      | <i>LacCer (d18:1/12:0)</i>   | 264.2687 - 264.2736  |
| 93  | 1004,7972 | LacCer (d18:0/26:0)      | <i>LacCer (d18:1/12:0)</i>   | 264.2687 - 264.2737  |
| 94  | 1002,7815 | LacCer(d18:1/26:0)       | <i>LacCer (d18:1/12:0)</i>   | 264.2687 - 264.2738  |
| 95  | 864,6407  | LacCer (d18:0/16:0)      | <i>LacCer (d18:1/12:0)</i>   | 264.2687 - 264.2739  |
| 96  | 806,5624  | LacCer (d14:1/16:0)      | <i>LacCer (d18:1/12:0)</i>   | 264.2687 - 264.2740  |
| 97  | 892,672   | LacCer (d18:0/18:0)      | <i>LacCer (d18:1/12:0)</i>   | 264.2687 - 264.2741  |
| 98  | 836,6094  | LacCer (d14:0/18:0)      | <i>LacCer (d18:1/12:0)</i>   | 264.2687 - 264.2742  |
| 99  | 890,6563  | LacCer (d18:1/18:0)      | <i>LacCer (d18:1/12:0)</i>   | 264.2687 - 264.2743  |
| 100 | 976,7659  | LacCer (d18:0/24:0)      | <i>LacCer (d18:1/12:0)</i>   | 264.2687 - 264.2744  |
| 101 | 974,7502  | LacCer (d18:1/24:0)      | <i>LacCer (d18:1/12:0)</i>   | 264.2687 - 264.2745  |
| 102 | 836,6094  | LacCer (d18:0/14:0)      | <i>LacCer (d18:1/12:0)</i>   | 264.2687 - 264.2746  |
| 103 | 834,5937  | LacCer (d18:1/14:0)      | <i>LacCer (d18:1/12:0)</i>   | 264.2687 - 264.2747  |
| 104 | 484,465   | dHCer (d18:0/12:0)       | <i>Ceramide (d18:1/12:0)</i> | 264.2687 - 264.2747  |
| 105 | 540,535   | dHCer (d18:0/16:0)       | <i>Ceramide (d18:1/12:0)</i> | 284.2943 - 284.2983  |
| 106 | 568,563   | dHCer (d18:0/18:0)       | <i>Ceramide (d18:1/12:0)</i> | 284.2943 - 284.2983  |
| 107 | 596,5976  | dHCer (d18:0/20:0)       | <i>Ceramide (d18:1/12:0)</i> | 284.2943 - 284.2983  |
| 108 | 624,6289  | dHCer (d18:0/22:0)       | <i>Ceramide (d18:1/12:0)</i> | 284.2943 - 284.2983  |
| 109 | 650,6446  | dHCer (d18:0/24:1(15Z))  | <i>Ceramide (d18:1/12:0)</i> | 284.2943 - 284.2983  |
| 110 | 652,6602  | dHCer (d18:0/24:0)       | <i>Ceramide (d18:1/12:0)</i> | 284.2943 - 284.2983  |
| 111 | 678,6759  | dHCer (d18:0/26:1(17Z))  | <i>Ceramide (d18:1/12:0)</i> | 284.2943 - 284.2983  |
| 112 | 680,6915  | dHCer (d18:0/26:0)       | <i>Ceramide (d18:1/12:0)</i> | 284.2943 - 284.2983  |
| 113 | 566,5507  | dHCer (d18:0/18:1)       | <i>Ceramide (d18:1/12:0)</i> | 284.2943 - 284.2983  |



|     |          |                     |                              |                     |
|-----|----------|---------------------|------------------------------|---------------------|
| 114 | 512,5037 | dHCer (d18:0/14:0)  | <i>Ceramide (d18:1/12:0)</i> | 284.2943 - 284.2983 |
| 115 | 668,6551 | dHCer (d18:0/h24:0) | <i>Ceramide (d18:1/12:0)</i> | 284.2943 - 284.2983 |
| 116 | 696,6864 | dHCer (d18:0/h26:0) | <i>Ceramide (d18:1/12:0)</i> | 284.2943 - 284.2983 |
| 117 | 570,5456 | dHCer (d18:0/h17:0) | <i>Ceramide (d18:1/12:0)</i> | 284.2943 - 284.2983 |
| 118 | 498,4881 | dHCer (d18:0/13:0)  | <i>Ceramide (d18:1/12:0)</i> | 284.2943 - 284.2983 |
| 119 | 526,5194 | dHCer (d18:0/15:0)  | <i>Ceramide (d18:1/12:0)</i> | 284.2943 - 284.2983 |
| 120 | 554,5507 | dHCer (d18:0/17:0)  | <i>Ceramide (d18:1/12:0)</i> | 284.2943 - 284.2983 |
| 121 | 568,3566 | dHCer (d20:0/16:0)  | <i>Ceramide (d18:1/12:0)</i> | 284.2943 - 284.2983 |
| 122 | 596,5976 | dHCer (d20:0/18:0)  | <i>Ceramide (d18:1/12:0)</i> | 284.2943 - 284.2983 |
| 123 | 624,6289 | dHCer (d20:0/20:0)  | <i>Ceramide (d18:1/12:0)</i> | 284.2943 - 284.2984 |
| 124 | 652,6602 | dHCer (d20:0/22:0)  | <i>Ceramide (d18:1/12:0)</i> | 284.2943 - 284.2985 |
| 125 | 680,6915 | dHCer (d20:0/24:0)  | <i>Ceramide (d18:1/12:0)</i> | 284.2943 - 284.2986 |
| 126 | 708,7228 | dHCer (d20:0/26:0)  | <i>Ceramide (d18:1/12:0)</i> | 284.2943 - 284.2987 |

## Internal standards (IS)

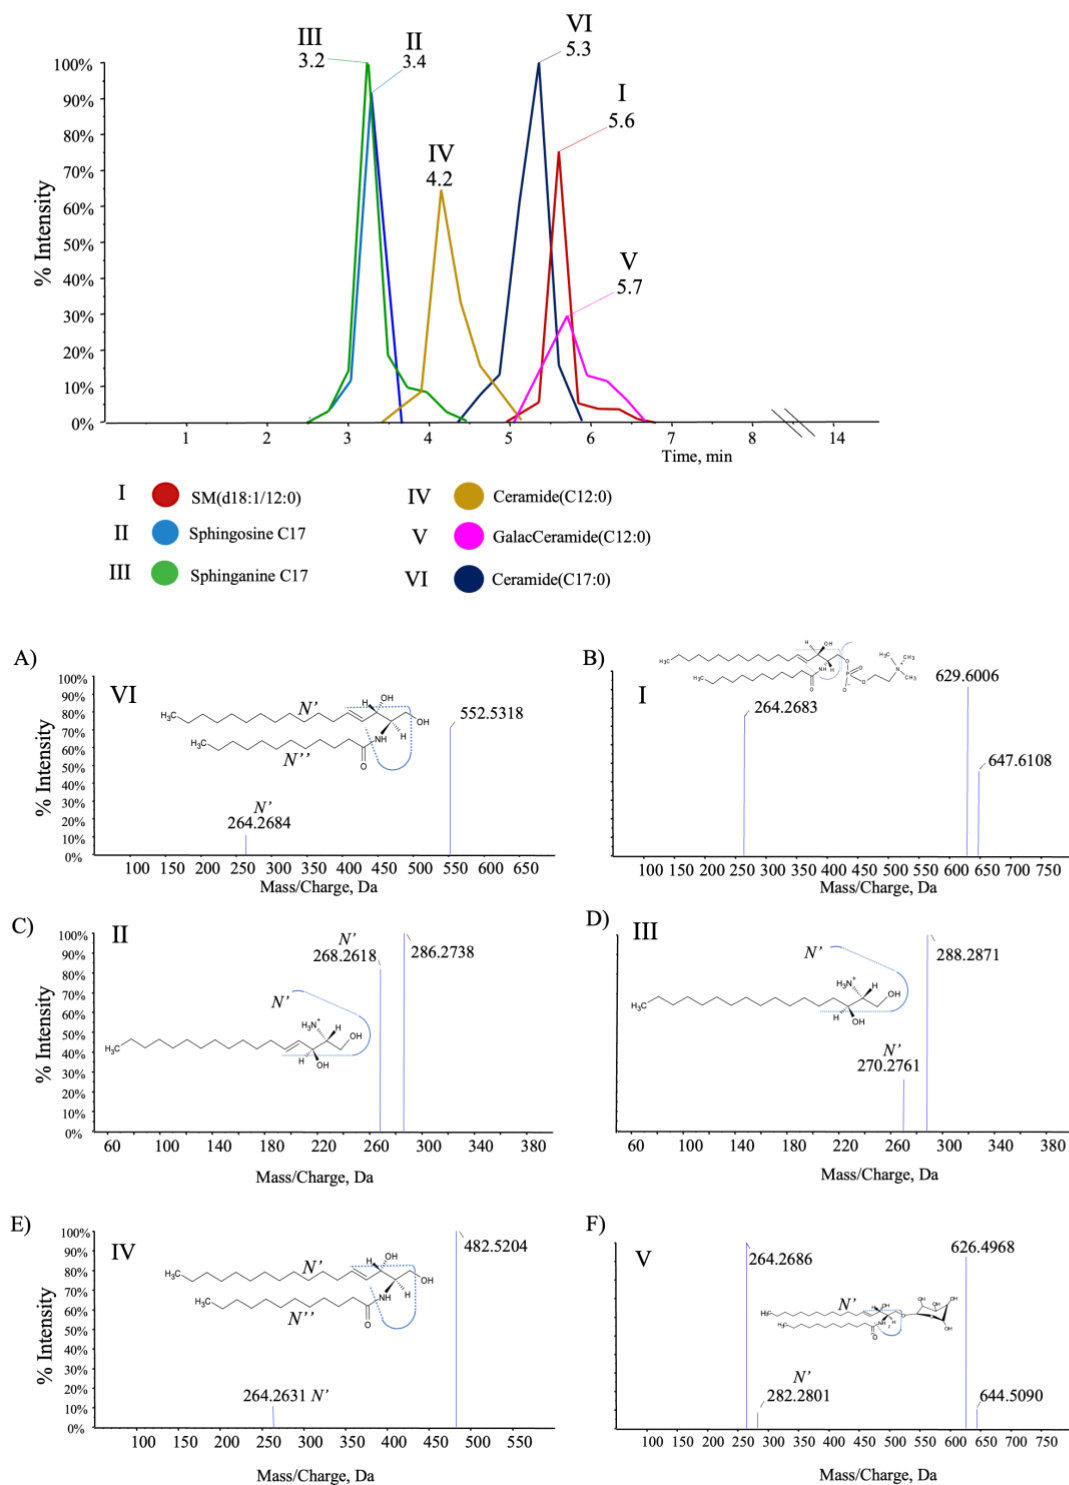

**Supplementary Figure 5. Chromatographic profile and mass spectra of standards used as reference for analysis.** (I) Sphingomyelin (d18:0/12:0). (II) Sphingosine (17:0). (III) Sphinganine (17:0). (IV) Ceramide (12:0). (V) Galactosylceramide (12:0). (VI) Ceramide (17:0).

# Ceramides – (Ceramide(12:0) and Ceramide(17:0) IS)

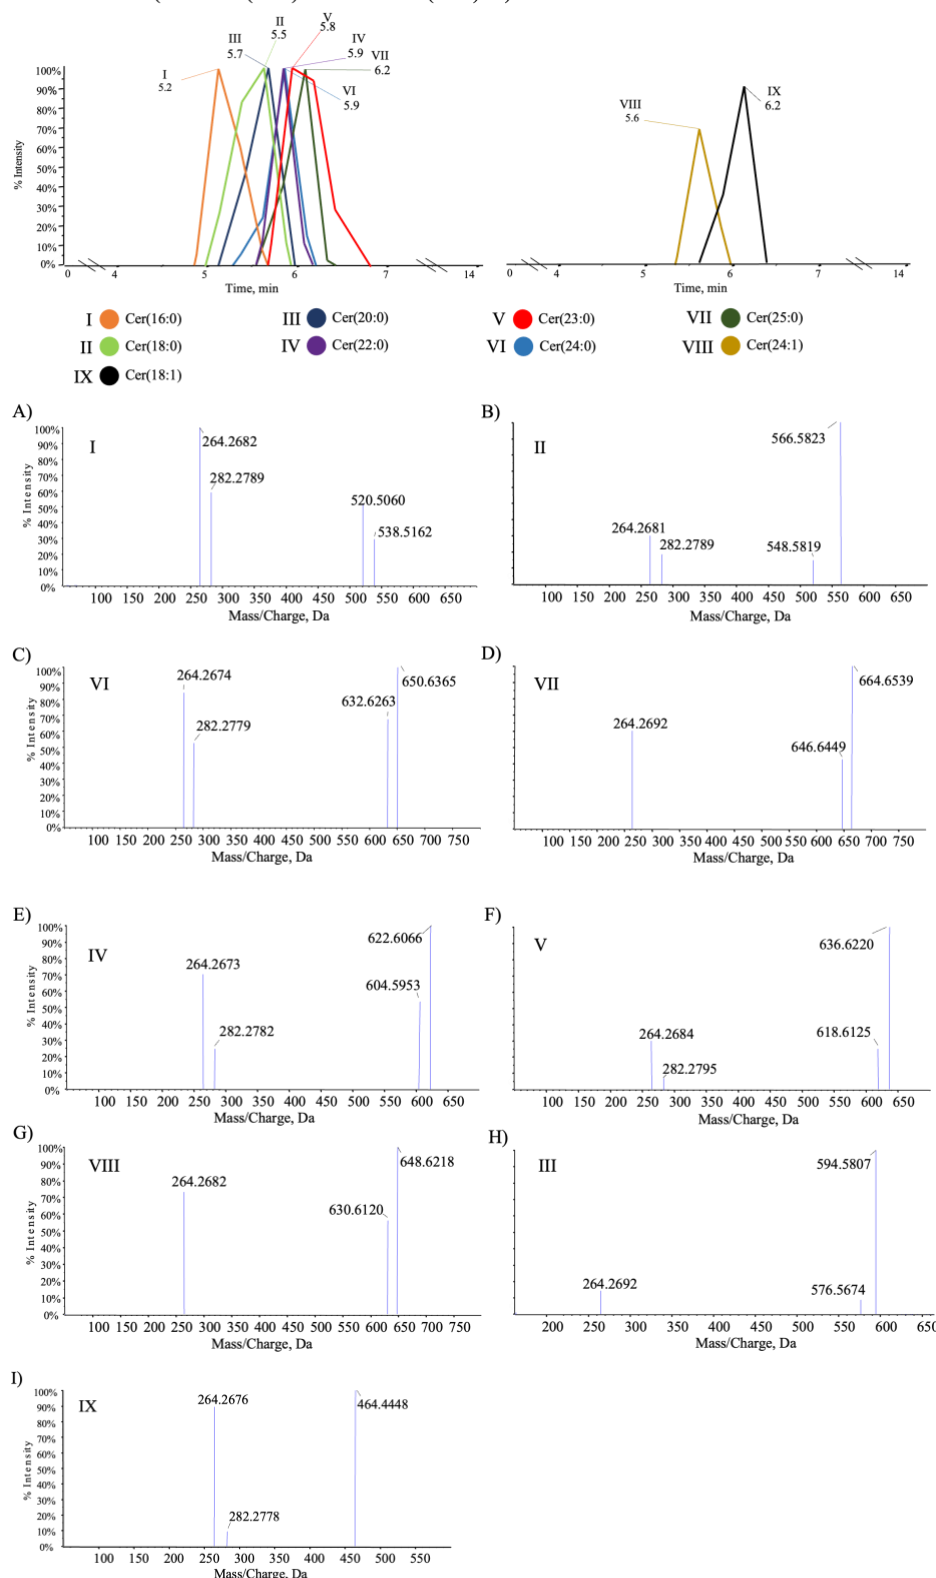

**Supplementary Figure 6. Chromatographic profile and mass spectra of detected ceramides.** (I) Ceramide (16:0). (II) Ceramide (18:0). (III) Ceramide (20:0). (IV) Ceramide (22:0). (V) Ceramide (23:0). (VI) Ceramide (24:0). (VII) Ceramide (25:0). (VIII) Ceramide (24:1). (IX) Ceramide (18:1).

## Sphingomyelin – (SM(d18:1/12:0) IS)

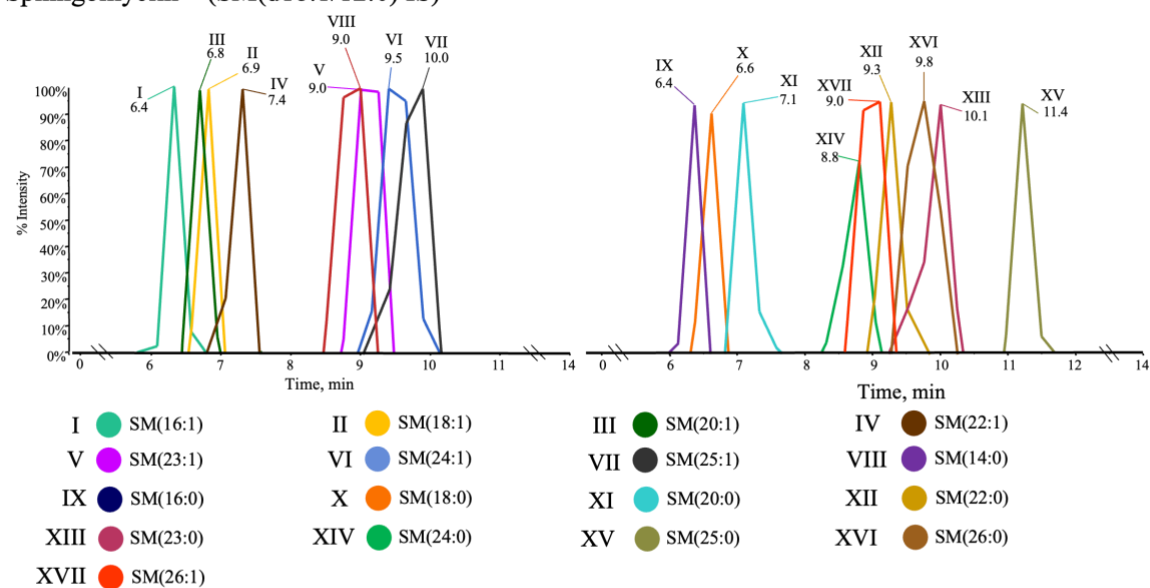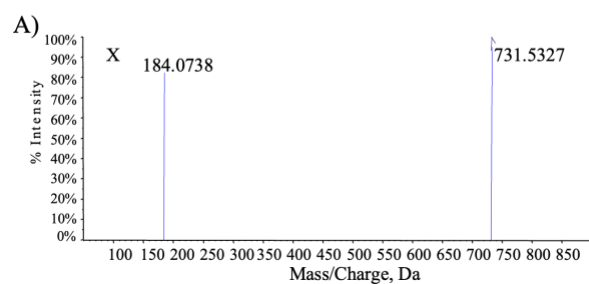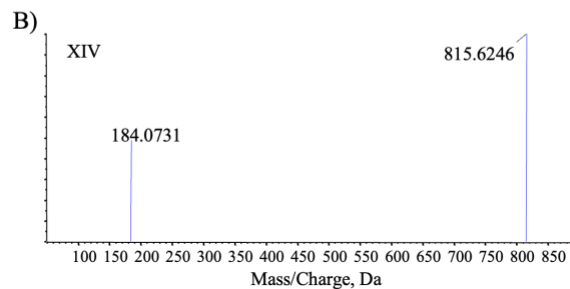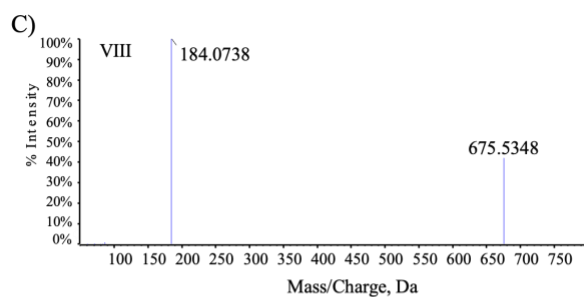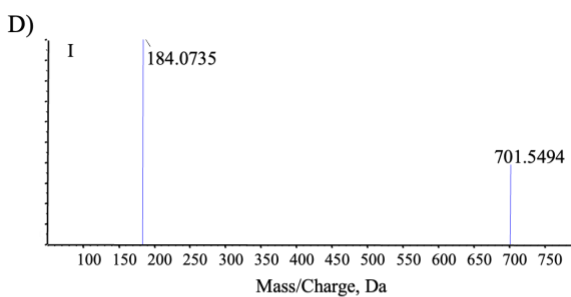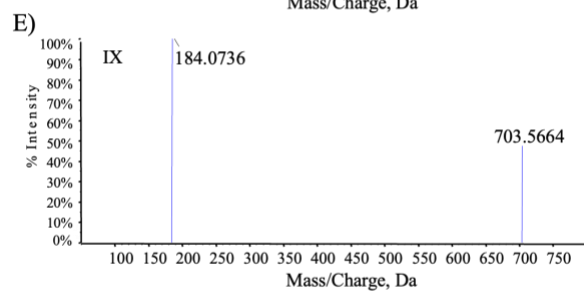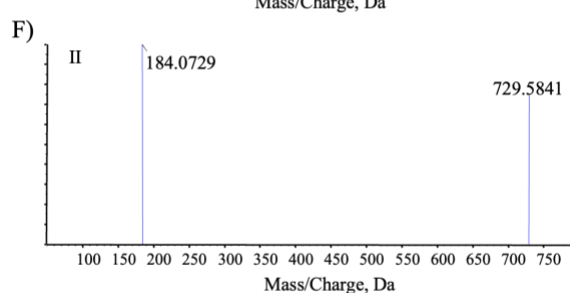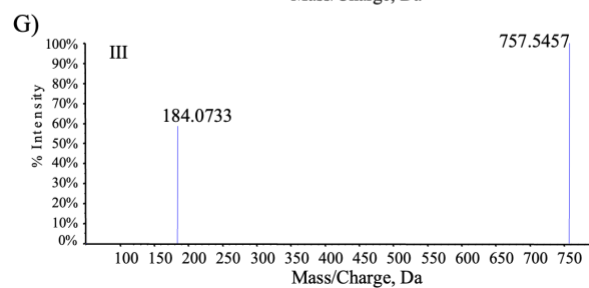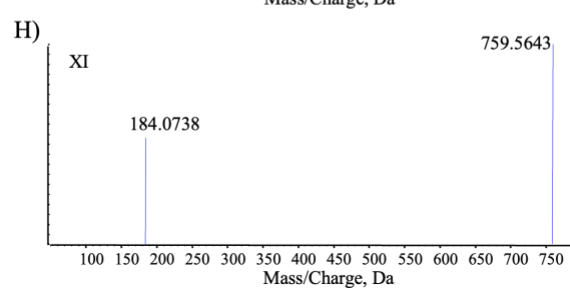

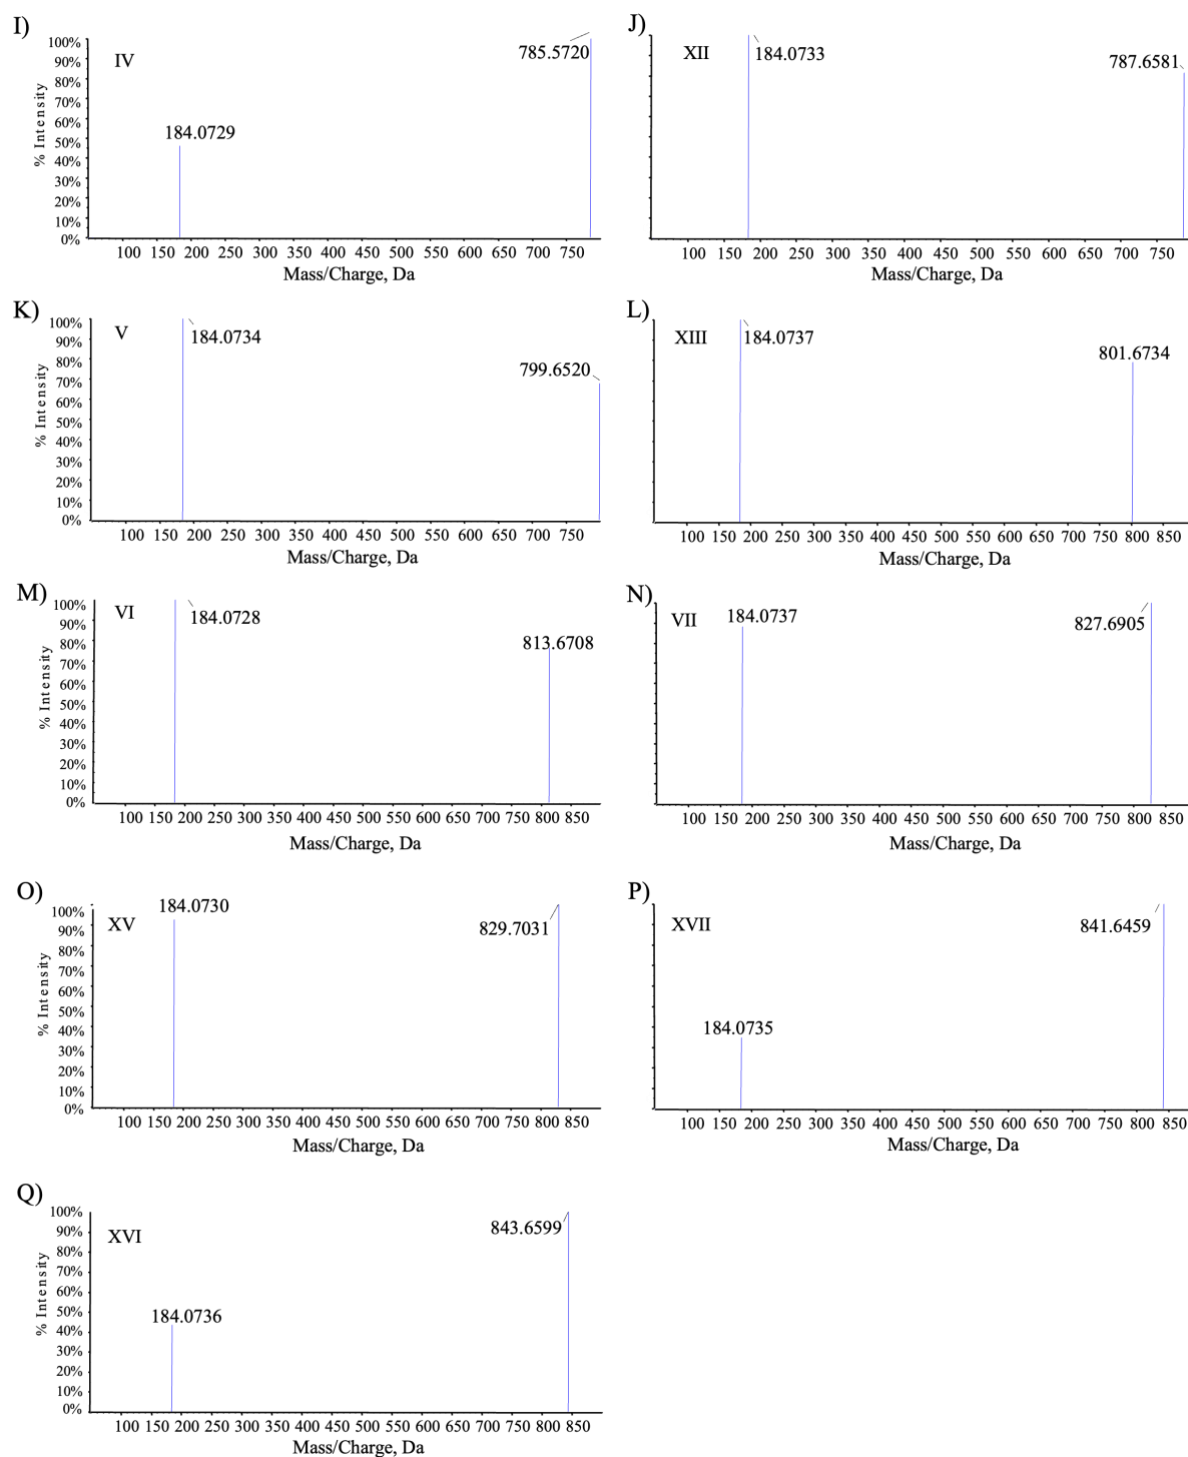

**Supplementary Figure 7. Chromatographic profile and mass spectra of detected sphingomyelins.** (I) Sphingomyelin (16:1). (II) Sphingomyelin (18:1). (III) Sphingomyelin (20:1). (IV) Sphingomyelin (22:1). (V) Sphingomyelin (23:1). (VI) Sphingomyelin (24:1). (VII) Sphingomyelin (25:1). (VIII) Sphingomyelin (14:0). (IX) Sphingomyelin (16:0). (X) Sphingomyelin (18:0). (XI) Sphingomyelin (20:0). (XII) Sphingomyelin (22:0). (XIII) Sphingomyelin (23:0). (XIV) Sphingomyelin (24:0). (XV) Sphingomyelin (25:0). (XVI) Sphingomyelin (26:0). (XVII) Sphingomyelin (26:1).

## Hexosylceramides - Cer(12:0) IS

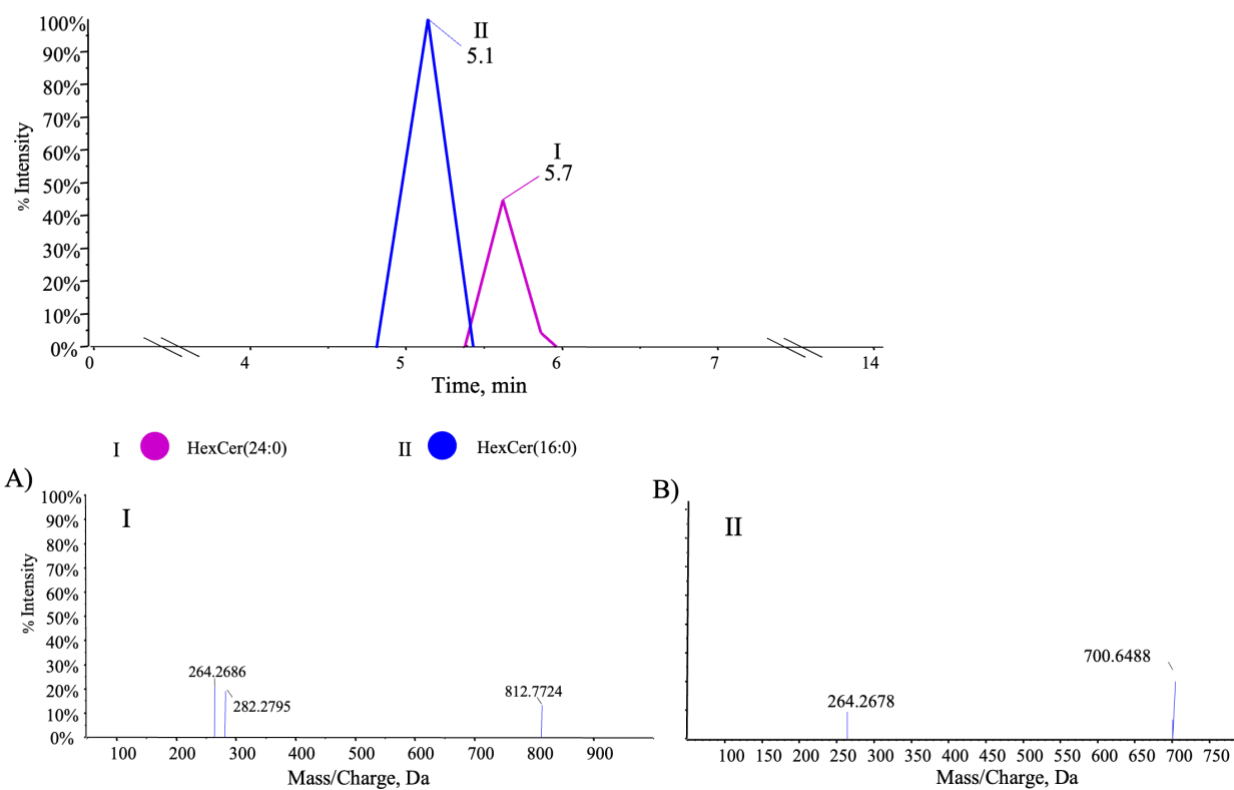

**Supplementary Figure 8. Chromatographic profile and mass spectra of detected hexosylceramides. (I) HexosylCeramide (24:0). (II) HexosylCeramide (16:0).**

# LacCeramides - LacCer(12:0) IS

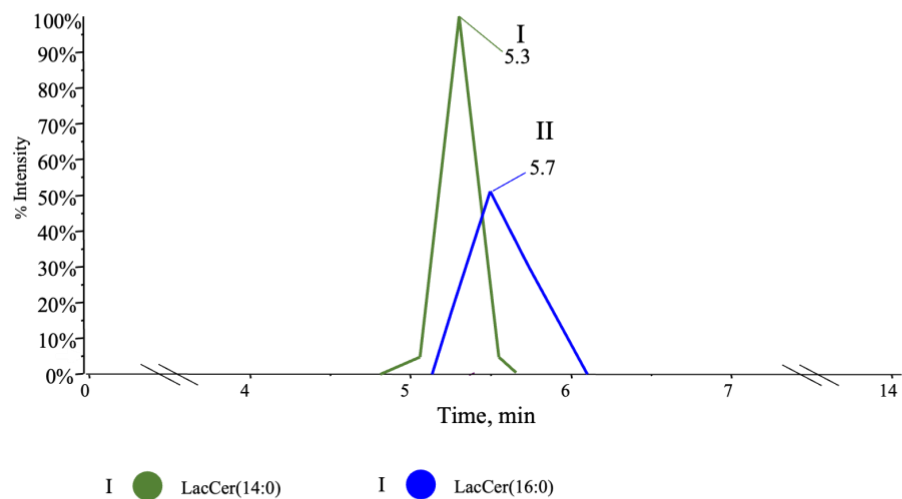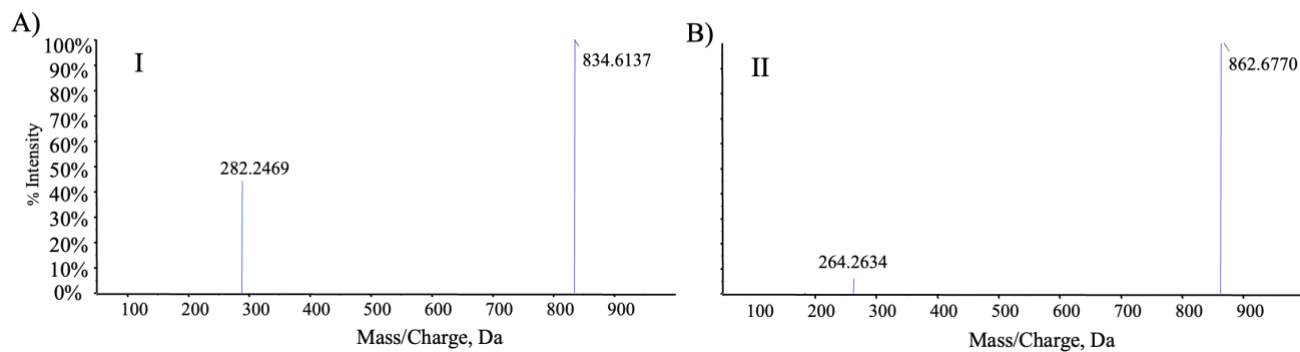

**Supplementary Figure 9. Chromatographic profile and mass spectra of detected lactosylceramides. (I) LacCer (14:0). (II) LacCer (16:0).**

## Sphingosine - (Sphingosine C17:0 IS)

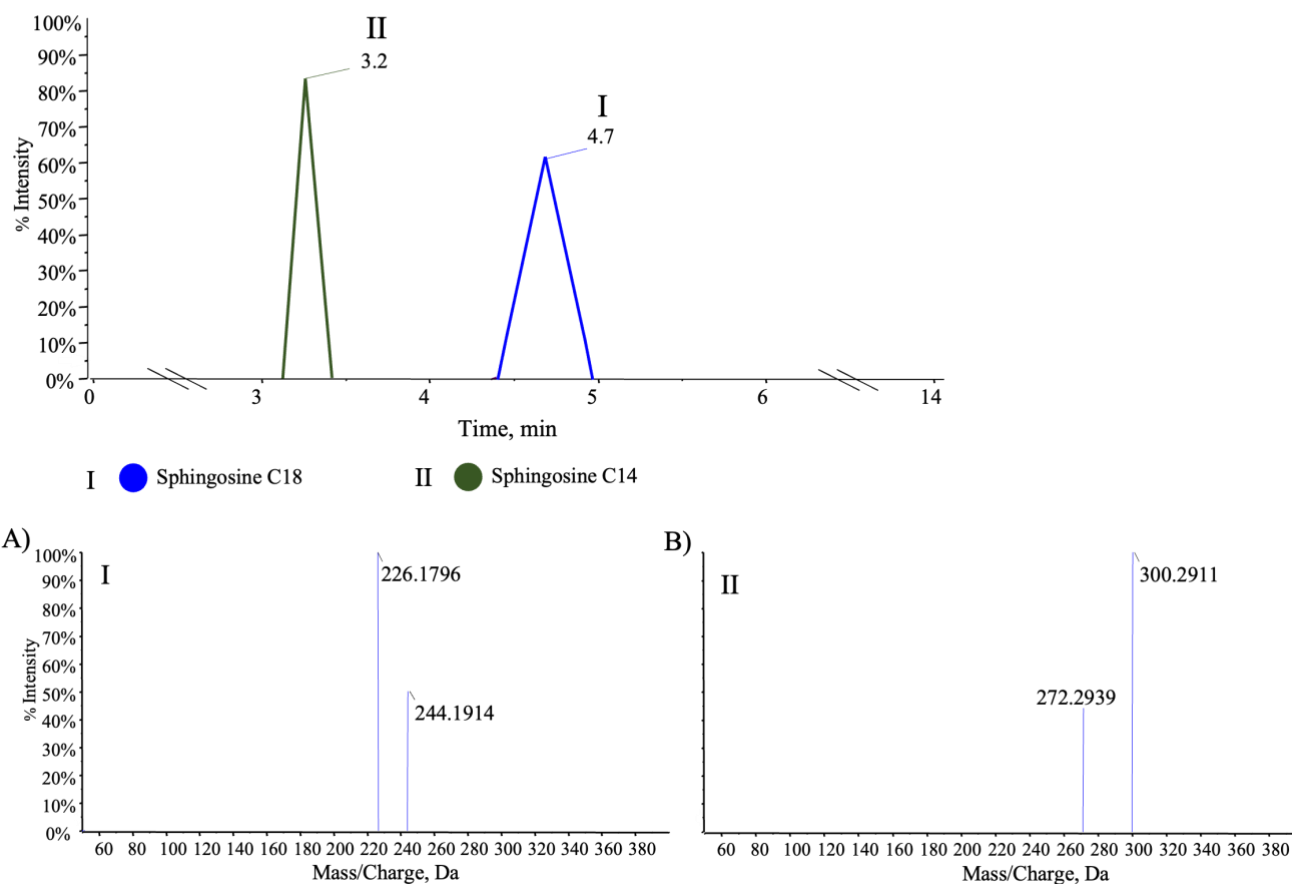

**Supplementary Figure 10. Chromatographic profile and mass spectra of detected sphingosines. (I) Sphingosine (18:0). (II) Sphingosine (14:0).**



## Sphinganine – (Sphingosine C17:0 IS)

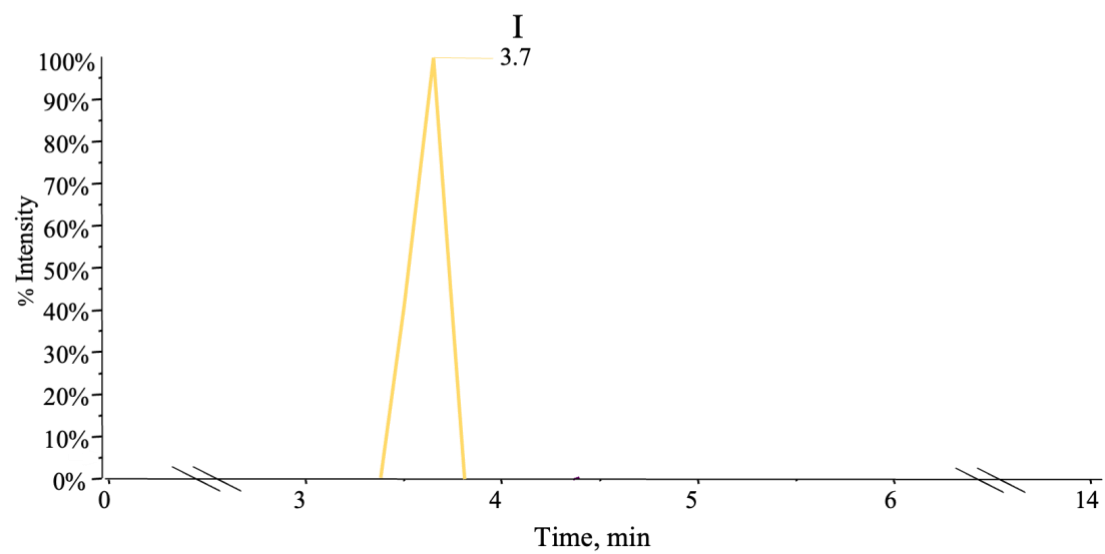

I ● Sphinganine(18:0)

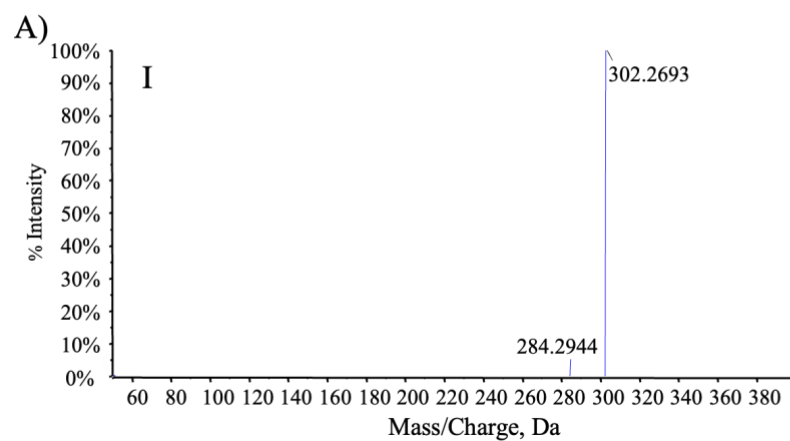

**Supplementary Figure 11. Chromatographic profile and mass spectra of detected sphinganine. (I) Sphinganine (18:0).**

## Dihydroceramides – (Ceramide(12:0) IS)

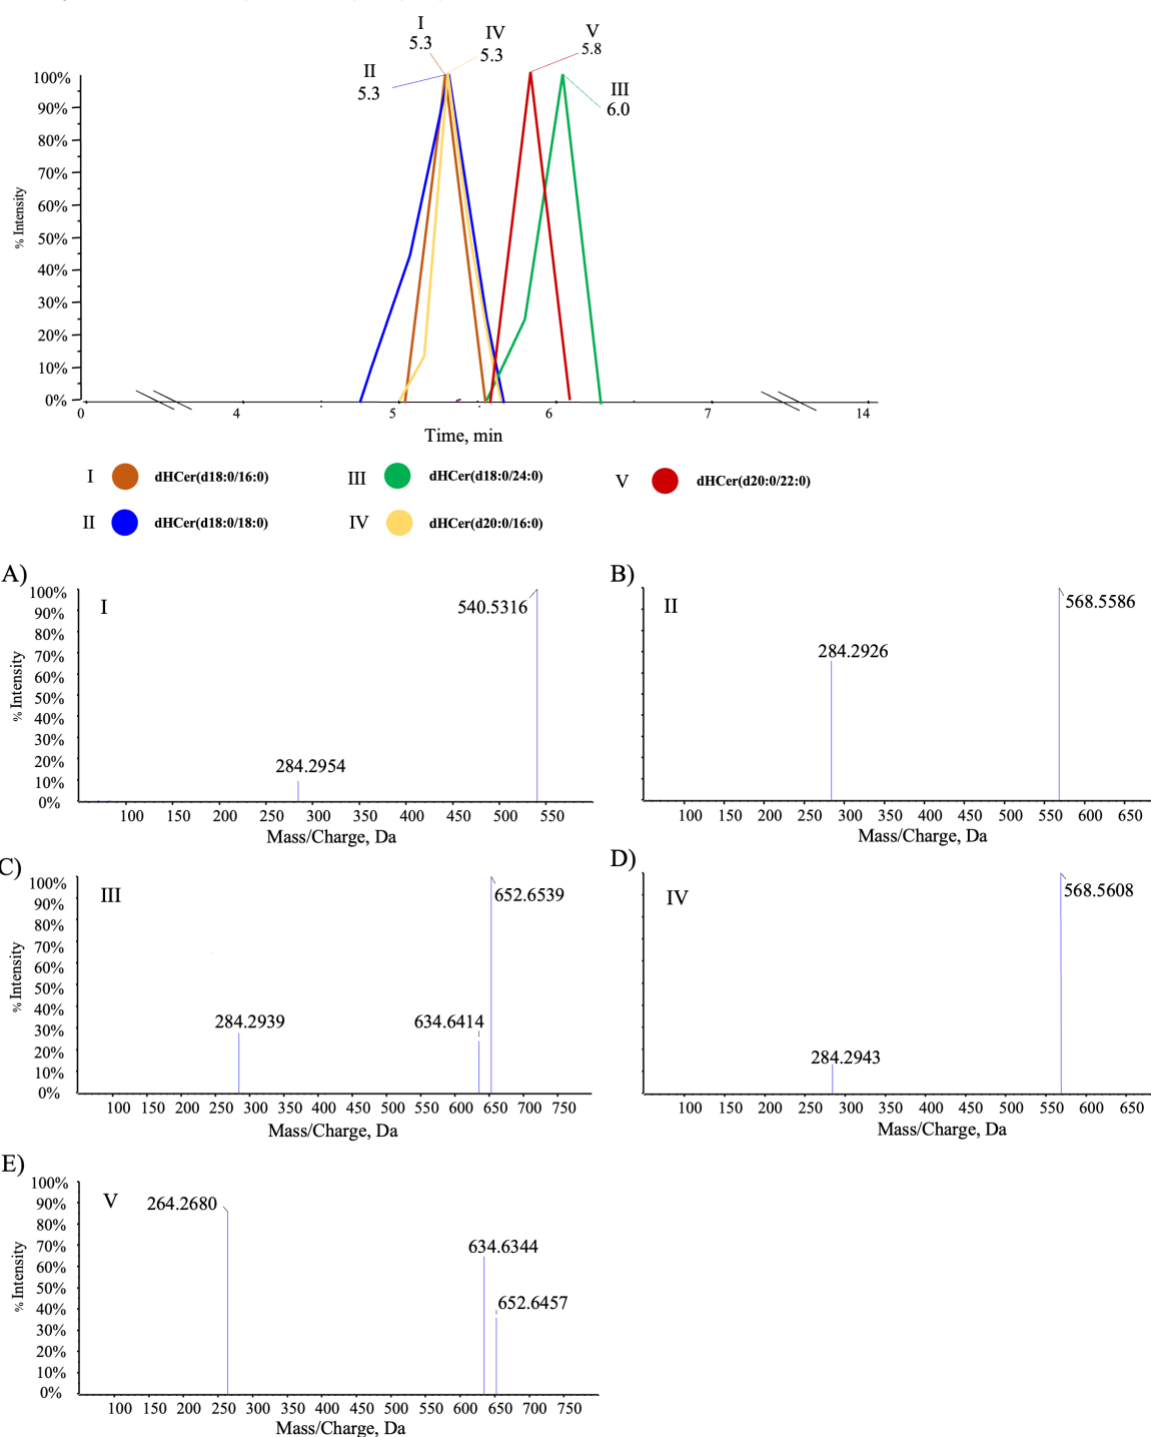

**Supplementary Figure 12. Chromatographic profile and mass spectra of detected dihydroceramides.** (I) dHCer(d18:0/16:0). (II) dHCer(d18:0/18:0). (III) dHCer(d18:0/24:0). (IV) dHCer(d20:0/16:0). (V) dHCer(d20:0/22:0).

**Supplementary Table 3. List of sphingolipid pathway enzymes and their respective acronyms and ID number.**

| Enzyme name                                                                      | Acronym enzyme | Acronym Gene | HGNC ID | NCBI ID |
|----------------------------------------------------------------------------------|----------------|--------------|---------|---------|
| Serine palmitoyltransferase long chain base subunit 1                            | SPT            | SPTLC1       | 11277   | 10558   |
| Serine palmitoyltransferase long chain base subunit 2                            | SPT            | SPTLC2       | 11278   | 9517    |
| Serine palmitoyltransferase long chain base subunit 3                            | SPT            | SPTLC3       | 16253   | 55304   |
| 3-ketodihydrosphingosine reductase                                               | KDR            | KDSR         | 4021    | 2531    |
| Ceramide synthase 1                                                              | CerS           | CERS1        | 14253   | 10715   |
| Ceramide synthase 2                                                              | CerS           | CERS2        | 14076   | 29956   |
| Ceramide synthase 3                                                              | CerS           | CERS3        | 23752   | 204219  |
| Ceramide synthase 4                                                              | CerS           | CERS4        | 23747   | 79603   |
| Ceramide synthase 5                                                              | CerS           | CERS5        | 23749   | 91012   |
| Ceramide synthase 6                                                              | CerS           | CERS6        | 23826   | 253782  |
| Sphingomyelin synthase 1                                                         | SMS            | SGMS1        | 29799   | 259230  |
| Sphingomyelin synthase 2                                                         | SMS            | SGMS2        | 28395   | 166929  |
| Sphingomyelin phosphodiesterase 1                                                | SMase          | SMPD1        | 11120   | 6609    |
| Sphingomyelin phosphodiesterase 2                                                | SMase          | SMPD2        | 11121   | 6610    |
| Sphingomyelin phosphodiesterase 3                                                | SMase          | SMPD3        | 14240   | 55512   |
| Sphingomyelin phosphodiesterase 4                                                | SMase          | SMPD4        | 32949   | 55627   |
| N-acylsphingosine amidohydrolase (acid ceramidase)                               | Csase          | ASAH1        | 735     | 427     |
| N-acylsphingosine amidohydrolase 2 (Neutral ceramidase/non-lysosomal ceramidase) | Csase          | ASAH2        | 18860   | 56624   |
| Ceramide synthase 1                                                              | CerS           | CERS1        | 14253   | 10715   |
| Ceramide synthase 2                                                              | CerS           | CERS2        | 14076   | 29956   |
| Ceramide synthase 3                                                              | CerS           | CERS3        | 23752   | 204219  |
| Ceramide synthase 4                                                              | CerS           | CERS4        | 23747   | 79603   |
| Ceramide synthase 5                                                              | CerS           | CERS5        | 23749   | 91012   |
| Ceramide synthase 6                                                              | CerS           | CERS6        | 23826   | 253782  |

## References

1. Fedorova, M, Lange, M: Evaluation of lipid quantification accuracy using HILIC and RPLC MS on the example of NIST<sup>®</sup> SRM<sup>®</sup> 1950 metabolites in human plasma. *Anal Bioanal Chem* 412, 3573–3584 (2020). <https://doi.org/10.1007/s00216-020-02576-x>
