# Supplementary material for: Plasma Sphingomyelin Disturbances: Unveiling Its Dual Role as a Crucial Imunopathological Factor and a Severity Prognostic Biomarker in COVID-19
Source: Preprints.org preprint supplement (doi:10.20944/preprints202306.0752.v1), 2023-06-12
Supplement: Supplementary file 1 [file Supplementary Table 4.xlsx]

## Sheet: Sheet1
	Age	BMI	Infection days	Hospitalization days	Clinical Score	Sat. O2 admission	O2 Infused	Glycemia	PCR	INR	Platelets	Hemacy	Total Leukocytes	Neutrophil	Lymphocyte	RNL	Monocyte	IL-10	IL-6	IL-8/CXCL-8	IL-1β	SM (24:1)	SM (24:0)	Cer (24:1)	Cer (24:0)
Age		0.13087	0.000415305	7.52089e-27	8.38843e-30	1.63771e-24	5.93523e-31	4.76336e-18	0.592505	0.890625	0.679057	3.49828e-07	0.000278271	1.20855e-11	3.60362e-26	1.45584e-27	0.0633318	6.81216e-16	1.31598e-30	1.43241e-26	0.109659	9.23539e-13	7.14424e-08	0.0409837	0.00104096
BMI	0.13087		0.000900664	0.000129709	1.20492e-06	2.81622e-06	6.72714e-05	0.000239664	0.791962	0.00621257	0.072574	0.184849	0.0415252	0.0277545	0.416614	0.055713	0.268259	0.00722752	7.80223e-06	0.00044953	0.131192	0.857397	0.778089	0.074828	0.846894
Infection days	0.000415305	0.000900664		2.61038e-05	2.42629e-14	6.1705e-06	0.000234403	7.7808e-05	0.0743828	0.224989	0.718471	0.304756	0.0820377	0.0454325	0.0283829	0.0181871	0.721439	0.000225773	1.89001e-05	2.31958e-08	0.292133	0.00294865	0.0743188	0.347275	0.639911
Hospitalization days	7.52089e-27	0.000129709	2.61038e-05		2.19175e-70	3.51375e-34	1.46321e-77	1.66473e-21	0.144735	0.0281511	0.0937423	7.31464e-11	9.05334e-07	3.64337e-21	1.6991e-33	1.30941e-45	0.273602	4.95922e-23	6.56344e-41	3.51654e-30	0.0722626	7.06813e-16	9.38224e-10	0.0658156	0.0043203
Clinical Score	8.38843e-30	1.20492e-06	2.42629e-14	2.19175e-70		1.17609e-49	1.80942e-88	4.31231e-22	0.00195189	0.0568554	0.230314	5.85353e-09	1.55545e-08	1.67294e-23	1.83237e-29	1.1262e-44	0.219256	1.70941e-23	9.39144e-50	5.51362e-39	0.0351665	7.53803e-14	1.73248e-07	0.581738	0.0178412
Sat. O2 admission	1.63771e-24	2.81622e-06	6.1705e-06	3.51375e-34	1.17609e-49		1.11966e-40	5.60534e-16	0.109603	0.00471981	0.999698	0.000214397	9.29442e-06	3.84796e-17	1.07257e-23	1.25653e-32	0.0606915	4.51684e-18	5.3565e-31	8.37028e-23	0.0478827	5.36155e-09	1.10998e-05	0.196223	0.165293
O2 Infused	5.93523e-31	6.72714e-05	0.000234403	1.46321e-77	1.80942e-88	1.11966e-40		4.05675e-20	2.26191e-06	0.310551	0.292136	2.25787e-11	2.28065e-07	5.83822e-23	3.25563e-37	3.56412e-51	0.395555	1.12299e-21	3.30033e-53	3.42734e-36	0.0694188	4.16488e-16	1.66363e-08	0.132835	0.00433382
Glycemia	4.76336e-18	0.000239664	7.7808e-05	1.66473e-21	4.31231e-22	5.60534e-16	4.05675e-20		0.214965	0.0893352	0.594843	0.00164986	6.96072e-06	7.88328e-12	4.50746e-11	2.27813e-18	0.0222442	5.69235e-10	8.94728e-15	7.57333e-15	0.877429	2.40992e-06	5.92166e-05	0.389954	0.000778677
PCR	0.592505	0.791962	0.0743828	0.144735	0.00195189	0.109603	2.26191e-06	0.214965		0.000200299	0.223827	0.00597386	0.290172	0.253736	0.195932	0.089273	0.786468	0.746084	4.62009e-05	0.093009	0.152648	0.746205	0.39452	0.707668	0.555838
INR	0.890625	0.00621257	0.224989	0.0281511	0.0568554	0.00471981	0.310551	0.0893352	0.000200299		0.0715861	0.292267	0.378575	0.641418	0.393051	0.333643	0.190454	0.420511	0.734479	0.801505	0.31236	0.178167	0.347542	0.0026062	0.442313
Platelets	0.679057	0.072574	0.718471	0.0937423	0.230314	0.999698	0.292136	0.594843	0.223827	0.0715861		0.459405	0.000145986	0.00458139	0.00132932	0.65225	4.25981e-05	0.523263	0.833557	0.369787	0.609886	0.284316	0.120727	0.251617	0.800579
Hemacy	3.49828e-07	0.184849	0.304756	7.31464e-11	5.85353e-09	0.000214397	2.25787e-11	0.00164986	0.00597386	0.292267	0.459405		0.0923513	0.000320746	1.24609e-07	1.62549e-08	0.051654	1.10765e-06	2.07641e-11	3.55417e-07	0.00897098	0.00523307	0.0369007	0.0209686	0.0382219
Total Leukocytes	0.000278271	0.0415252	0.0820377	9.05334e-07	1.55545e-08	9.29442e-06	2.28065e-07	6.96072e-06	0.290172	0.378575	0.000145986	0.0923513		1.44977e-81	0.672327	8.05433e-16	2.20356e-10	0.023142	2.19786e-05	0.000449097	0.117474	0.00473158	0.0767823	0.0145511	0.00880808
Neutrophil	1.20855e-11	0.0277545	0.0454325	3.64337e-21	1.67294e-23	3.84796e-17	5.83822e-23	7.88328e-12	0.253736	0.641418	0.00458139	0.000320746	1.44977e-81		2.92374e-08	5.17361e-56	0.000303965	1.26451e-07	1.92605e-14	2.35796e-10	0.126673	4.69056e-07	0.000297744	0.0412945	0.00187736
Lymphocyte	3.60362e-26	0.416614	0.0283829	1.6991e-33	1.83237e-29	1.07257e-23	3.25563e-37	4.50746e-11	0.195932	0.393051	0.00132932	1.24609e-07	0.672327	2.92374e-08		6.98948e-64	5.2263e-06	3.04533e-19	6.4586e-27	1.79327e-22	0.371797	1.00879e-12	3.58226e-08	0.780454	0.00249443
RNL	1.45584e-27	0.055713	0.0181871	1.30941e-45	1.1262e-44	1.25653e-32	3.56412e-51	2.27813e-18	0.089273	0.333643	0.65225	1.62549e-08	8.05433e-16	5.17361e-56	6.98948e-64		0.286224	4.52294e-20	3.499e-32	7.10944e-24	0.141643	3.95636e-13	1.60331e-07	0.259311	0.000485326
Monocyte	0.0633318	0.268259	0.721439	0.273602	0.219256	0.0606915	0.395555	0.0222442	0.786468	0.190454	4.25981e-05	0.051654	2.20356e-10	0.000303965	5.2263e-06	0.286224		0.164294	0.515466	0.640082	0.997086	0.819129	0.802301	0.338697	0.446514
IL-10	6.81216e-16	0.00722752	0.000225773	4.95922e-23	1.70941e-23	4.51684e-18	1.12299e-21	5.69235e-10	0.746084	0.420511	0.523263	1.10765e-06	0.023142	1.26451e-07	3.04533e-19	4.52294e-20	0.164294		5.09944e-34	2.25022e-43	0.508305	1.61984e-07	0.00022486	0.320935	0.535521
IL-6	1.31598e-30	7.80223e-06	1.89001e-05	6.56344e-41	9.39144e-50	5.3565e-31	3.30033e-53	8.94728e-15	4.62009e-05	0.734479	0.833557	2.07641e-11	2.19786e-05	1.92605e-14	6.4586e-27	3.499e-32	0.515466	5.09944e-34		1.41164e-45	0.0659093	9.06796e-11	3.80295e-05	0.196293	0.0807065
IL-8/CXCL-8	1.43241e-26	0.00044953	2.31958e-08	3.51654e-30	5.51362e-39	8.37028e-23	3.42734e-36	7.57333e-15	0.093009	0.801505	0.369787	3.55417e-07	0.000449097	2.35796e-10	1.79327e-22	7.10944e-24	0.640082	2.25022e-43	1.41164e-45		0.722187	9.83431e-11	1.04458e-05	0.568644	0.0445516
IL-1β	0.109659	0.131192	0.292133	0.0722626	0.0351665	0.0478827	0.0694188	0.877429	0.152648	0.31236	0.609886	0.00897098	0.117474	0.126673	0.371797	0.141643	0.997086	0.508305	0.0659093	0.722187		0.533244	0.251594	0.716482	0.902966
SM (24:1)	9.23539e-13	0.857397	0.00294865	7.06813e-16	7.53803e-14	5.36155e-09	4.16488e-16	2.40992e-06	0.746205	0.178167	0.284316	0.00523307	0.00473158	4.69056e-07	1.00879e-12	3.95636e-13	0.819129	1.61984e-07	9.06796e-11	9.83431e-11	0.533244		9.28559e-103	4.53597e-10	1.11859e-13
SM (24:0)	7.14424e-08	0.778089	0.0743188	9.38224e-10	1.73248e-07	1.10998e-05	1.66363e-08	5.92166e-05	0.39452	0.347542	0.120727	0.0369007	0.0767823	0.000297744	3.58226e-08	1.60331e-07	0.802301	0.00022486	3.80295e-05	1.04458e-05	0.251594	9.28559e-103		7.22846e-13	5.28833e-15
Cer (24:1)	0.0409837	0.074828	0.347275	0.0658156	0.581738	0.196223	0.132835	0.389954	0.707668	0.0026062	0.251617	0.0209686	0.0145511	0.0412945	0.780454	0.259311	0.338697	0.320935	0.196293	0.568644	0.716482	4.53597e-10	7.22846e-13		1.87575e-14
Cer (24:0)	0.00104096	0.846894	0.639911	0.0043203	0.0178412	0.165293	0.00433382	0.000778677	0.555838	0.442313	0.800579	0.0382219	0.00880808	0.00187736	0.00249443	0.000485326	0.446514	0.535521	0.0807065	0.0445516	0.902966	1.11859e-13	5.28833e-15	1.87575e-14
